# Supplementary material for: Spheroid Formation and Recovery Using Superhydrophobic Coating for Regenerative Purposes
Source: MDPI journal article supplement (doi:10.3390/pharmaceutics15092226), 2023-08-29
Supplement: s1 [file s1]

(a)

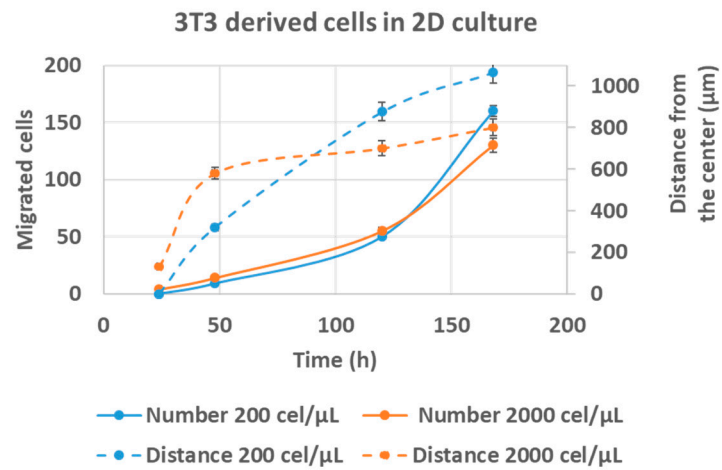

(b)

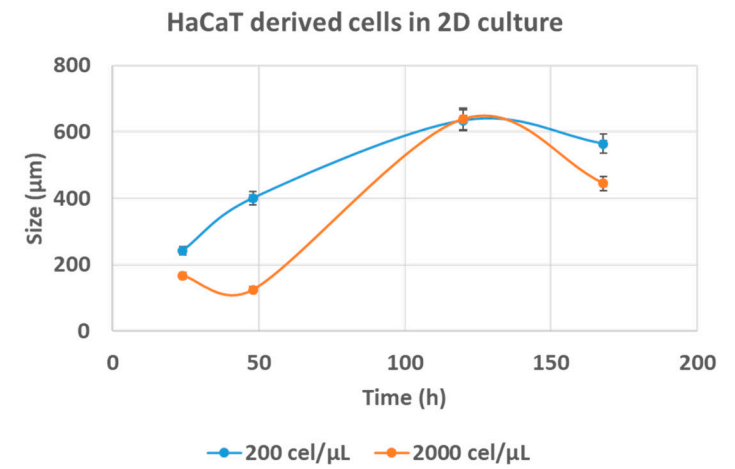

**Figure S1.** Derived parameters of 3T3 fibroblasts (a) and HaCaT keratinocytes (b) migrated from 3D spheroids over time.
